# Supplementary material for: Precisely tunable magnetic phase transition temperature, TC, through the formation of a molecular alloy in [NixPt1−x(mnt)2]−-based spin systems (mnt2− = maleonitriledithiolate, x = 0.09–0.91)
Source: Royal Society of Chemistry journal article supplement (doi:10.1039/c4dt00868e), 2014-01-01
Supplement: c4dt00868e1.pdf [file c4dt00868e1.pdf]

**Precisely tunable magnetic phase transition temperature,  $T_C$ , through formation of molecule alloy in  $[\text{Ni}_x\text{Pt}_{1-x}(\text{mnt})_2]^-$ -based spin systems ( $\text{mnt}^{2-}$  = maleonitriledithiolate,  $x = 0.09-0.91$ )**

Guo-Jun Yuan,<sup>a</sup> Hao Yang,<sup>a</sup> Shao-Xian Liu,<sup>a</sup> Jian-Lan Liu<sup>a</sup> and Xiao-Ming Ren<sup>\*a,b</sup>

<sup>a</sup> State Key Laboratory of Materials-Oriented Chemical Engineering and College of Science, Nanjing University of Technology, Nanjing 210009

<sup>b</sup> College of Materials Science and Engineering, Nanjing University of Technology, Nanjing 210009

Tel.: +86 25 58139476

Fax: +86 25 58139481

Email: [xmren@njut.edu.cn](mailto:xmren@njut.edu.cn)(RXM)

[ahchljygj@163.com](mailto:ahchljygj@163.com) (YGJ)

[yh2412@126.com](mailto:yh2412@126.com) (YH)

[sxliu@njut.edu.cn](mailto:sxliu@njut.edu.cn) (LSX)

[njutljl@163.com](mailto:njutljl@163.com) (LJL)

**Table S1** Inter-plane distances between the nearest neighbors (h1, h2) and interatomic distances of M...M (d1, d2), S...S (m1, m2, m3, m4) and the centroid-to-centroid distances (c1, c2), within an anionic or cation stack for alloy compounds [Cl-BzPy][Ni<sub>x</sub>Pt<sub>1-x</sub>(mnt)<sub>2</sub>] (x = 0.9-0.91) with the parent compounds at 296 K.

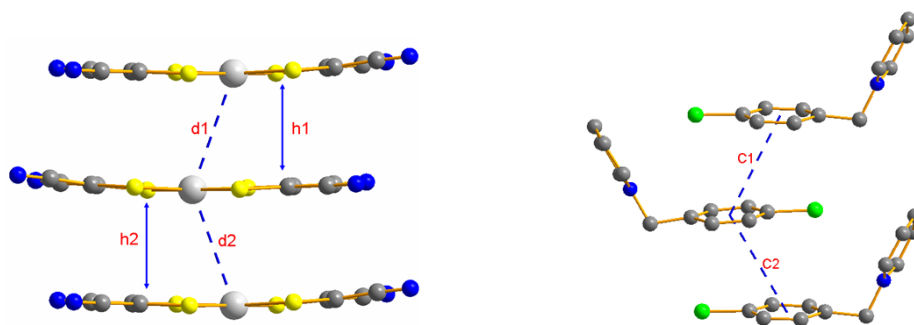

| Molar fraction     | h1    | h2    | d1    | d2    | c1     | c2    |
|--------------------|-------|-------|-------|-------|--------|-------|
| x = 0 <sup>2</sup> | 3.633 | 3.602 | 3.885 | 3.885 | 4.168  | 4.168 |
| x = 0.09           | 3.643 | 3.634 | 3.920 | 3.930 | 4.201) | 4.201 |
| x = 0.21           | 3.580 | 3.616 | 3.884 | 3.884 | 4.152  | 4.152 |
| x = 0.34           | 3.616 | 3.593 | 3.897 | 3.897 | 4.161  | 4.160 |
| x = 0.42           | 3.603 | 3.574 | 3.892 | 3.892 | 4.142  | 4.142 |
| x = 0.54           | 3.572 | 3.607 | 3.901 | 3.901 | 4.145  | 4.145 |
| x = 0.64           | 3.611 | 3.577 | 3.916 | 3.916 | 4.155  | 4.155 |
| x = 0.73           | 3.558 | 3.591 | 3.904 | 3.904 | 4.141  | 4.141 |
| 0.84               | 3.553 | 3.585 | 3.912 | 3.912 | 4.139  | 4.139 |
| x = 0.91           | 3.548 | 3.582 | 3.913 | 3.913 | 4.138  | 4.138 |
| x = 1 <sup>4</sup> | 3.575 | 3.539 | 3.914 | 3.914 | 4.133  | 4.133 |

| Molar fraction     | m1    | m2    | m3    | m4    | m     |
|--------------------|-------|-------|-------|-------|-------|
| x = 0 <sup>3</sup> | 3.986 | 4.079 | 3.883 | 3.705 | 3.913 |
| x = 0.09           | 3.941 | 3.713 | 4.068 | 4.100 | 3.956 |
| x = 0.21           | 4.080 | 3.996 | 3.698 | 3.892 | 3.916 |
| x = 0.34           | 3.905 | 3.703 | 4.019 | 4.077 | 3.926 |
| x = 0.42           | 3.904 | 3.704 | 4.020 | 4.063 | 3.922 |
| x = 0.54           | 4.076 | 4.029 | 3.712 | 3.912 | 3.932 |

|                    |       |       |       |       |       |
|--------------------|-------|-------|-------|-------|-------|
| x = 0.64           | 3.927 | 3.726 | 4.050 | 4.084 | 3.947 |
| x = 0.73           | 4.064 | 4.046 | 3.714 | 3.914 | 3.935 |
| x = 0.84           | 4.063 | 4.058 | 3.728 | 3.916 | 3.941 |
| x = 0.91           | 4.058 | 4.065 | 3.729 | 3.915 | 3.942 |
| x = 1 <sup>1</sup> | 4.050 | 4.069 | 3.734 | 3.910 | 3.941 |

### References

1. X. M. Ren, Q. J. Meng, Y. Song, C. S. Lu, C. J. Hu, X. Y. Chen, *Inorg. Chem.* 2002, **41**, 5686.
2. X. M. Ren, H. Okudera, R. K. Kremer, Y. Song, C. He, Q. J. Meng, P. H. Wu, *Inorg. Chem.* 2004, **43**, 2569.

**Figure S1** Variations of interatomic or interplane distances between neighboring anions in a stack (c1, c2, d1, d2, h1 and h2) as x change for [Cl-BzPy][Ni<sub>x</sub>Pt<sub>1-x</sub>(mnt)<sub>2</sub>] (x = 0.09-0.91) with two parent compounds at ambient temperature.

**Table S2** Ni and Pt molar fraction measured by Energy Dispersive Spectra (EDS) for [Cl-BzPy][Ni<sub>x</sub>Pt<sub>1-x</sub>(mnt)<sub>2</sub>] (x = 0.09-0.91).

| x   | 0.09  | 0.21  | 0.34  | 0.42  | 0.54  | 0.64  | 0.73  | 0.84  | 0.91  |
|-----|-------|-------|-------|-------|-------|-------|-------|-------|-------|
| Ni% | 8.33  | 17.16 | 25.77 | 33.69 | 42.10 | 50.24 | 60.60 | 70.38 | 78.12 |
| Pt% | 91.67 | 82.84 | 74.23 | 66.31 | 57.90 | 49.76 | 39.40 | 29.62 | 21.88 |

**Table S3** Ni and Pt molar fraction measured by Inductively coupled plasma-mass spectra (ICP-MS) for [Cl-BzPy][Ni<sub>x</sub>Pt<sub>1-x</sub>(mnt)<sub>2</sub>] (x = 0.09-0.91).

| Compound | Ni    | Pt   | Ni/Pt <sup>#</sup> | Ni/Pt <sup>*</sup> | Ni/Pt <sup>**</sup> |
|----------|-------|------|--------------------|--------------------|---------------------|
| x = 0.09 | 0.085 | 2.09 | 0.1359             | 0.1111             | 0.09695             |
| x = 0.21 | 0.48  | 5.35 | 0.2997             | 0.25               | 0.26526             |
| x = 0.34 | 1.22  | 8.77 | 0.4647             | 0.4286             | 0.50625             |
| x = 0.42 | 0.59  | 2.5  | 0.7884             | 0.6667             | 0.7347              |
| x = 0.54 | 2.11  | 6.22 | 1.1333             | 1                  | 1.15285             |
| x = 0.64 | 1.03  | 2.11 | 1.6308             | 1.5                | 1.74033             |
| x = 0.73 | 2.1   | 2.45 | 2.8635             | 2.3333             | 2.64977             |
| x = 0.84 | 4.22  | 3.06 | 4.6071             | 4                  | 5.43625             |
| x = 0.91 | 5.47  | 1.93 | 9.4683             | 9                  | 10.73985            |

<sup>#</sup> ICP; <sup>\*</sup>the molar ratio in the starting materials; <sup>\*\*</sup>the molar ratio from occupation factors

**Table S4** Crystal structure of [Cl-BzPy][Ni<sub>x</sub>Pt<sub>1-x</sub>(mnt)<sub>2</sub>] (x = 0.09, 0.54 and 0.91) at 100 K

| Compound                | x = 0.09      | x = 0.54    | x = 0.91      |
|-------------------------|---------------|-------------|---------------|
| Temp. (K)               |               | 100         |               |
| Wavelength              |               | 0.71073     |               |
| Formula weight          | 667.67        | 601.00      | 556.34        |
| CCDC no.                | 893368        | 893369      | 893370        |
| Crystal system          |               | Triclinic   |               |
| Space group             |               | P-1         |               |
| a(Å)                    | 7.1590(2)     | 7.1472(8)   | 7.1912(2)     |
| b(Å)                    | 12.2601(4)    | 12.1875(11) | 12.0953(6)    |
| c(Å)                    | 26.4337(11)   | 26.268(2)   | 26.0555(12)   |
| α(°)                    | 87.472(3)     | 87.956(7)   | 88.532(4)     |
| β(°)                    | 85.016(3)     | 85.550(8)   | 86.554(3)     |
| γ(°)                    | 75.650(3)     | 76.447(9)   | 77.252(3)     |
| V(Å <sup>3</sup> ),Z    | 2238.59(13)/4 | 2217.3(4)/4 | 2206.26(16)/4 |
| ρ (g·cm <sup>-1</sup> ) | 1.981         | 1.800       | 1.675         |
| F(000)                  | 1282          | 1184        | 1118          |

|                                                |                                             |                                  |                                  |
|------------------------------------------------|---------------------------------------------|----------------------------------|----------------------------------|
| Abs.coeff. (mm <sup>-1</sup> )                 | 6.286                                       | 3.681                            | 1.904                            |
| $\theta$ Range for data collection (°)         | 2.99-26.00                                  | 2.99-26.00                       | 2.99-26.00                       |
| Index ranges                                   | -9<h<8,<br>-14<k<15,<br>-27<l<32            | -8<h<8,<br>-15<k<14,<br>-32<l<32 | -8<h<8,<br>-14<k<14,<br>-32<l<24 |
| Rint                                           | 0.1027                                      | 0.1055                           |                                  |
| Independent reflect.<br>/restraints/parameters | 8775 / 0 / 555                              | 8684 / 12 / 361                  | 8643 / 0 / 560                   |
| Refinement method                              | Full-matrix least-squares on F <sup>2</sup> |                                  |                                  |
| Goodness of fit on F2                          | 1.277                                       | 1.142                            | 1.121                            |
| R1, wR2a [I>2 $\sigma$ (I)]                    | R1 = 0.1396<br>wR2 = 0.3277                 | R1 = 0.2621<br>wR2 = 0.5928      | R1 = 0.2430<br>wR2 = 0.5535      |
| R1, wR2a [all data]                            | R1 = 0.1548<br>wR2 = 0.3329                 | R1 = 0.2751<br>wR2 = 0.5969      | R1 = 0.2537<br>wR2 = 0.5572      |
| Residual (e·Å <sup>-3</sup> )                  | 5.225/-11.153                               | 10.100/-9.063                    | 4.569/-5.279                     |

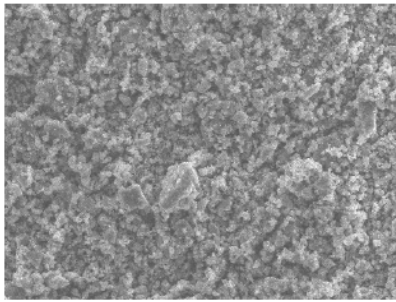

电子图像 1

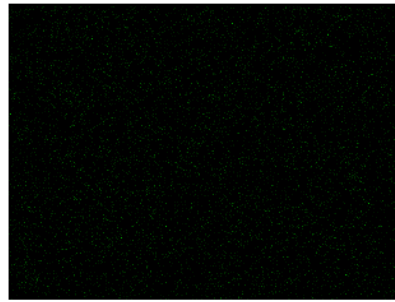

Ni Ka1

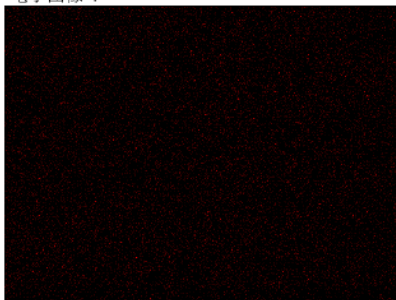

Pt La1

01 EDS elemental mapping of Ni, Pt in x = 0.09 sample

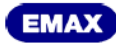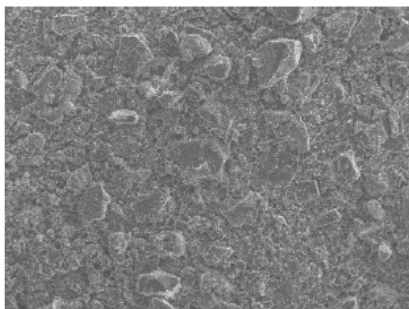

电子图像 1

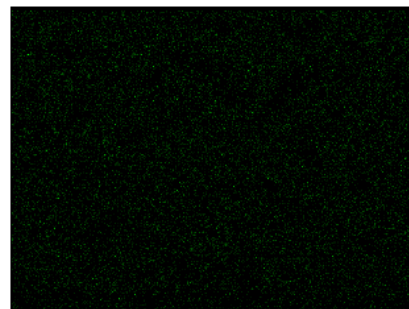

Ni Ka1

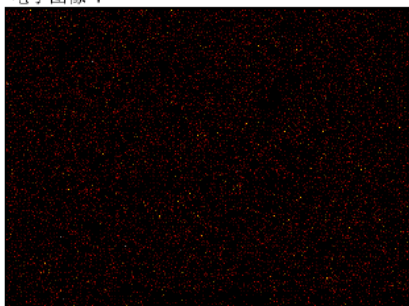

Pt La1

注释: 02 EDS elemental mapping of Ni, Pt in x = 0.54 sample

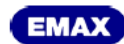

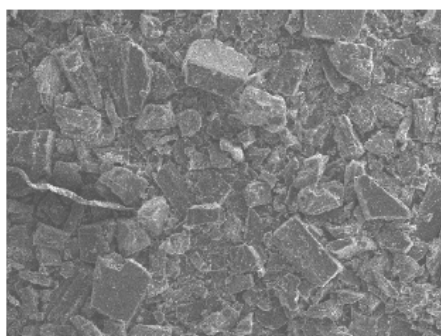

电子图像 1

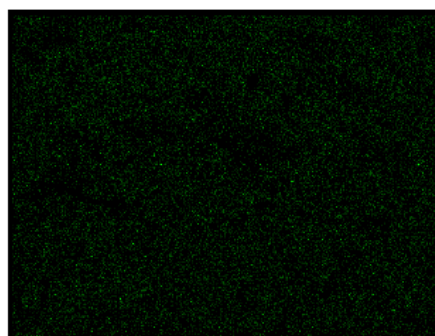

Ni Ka1

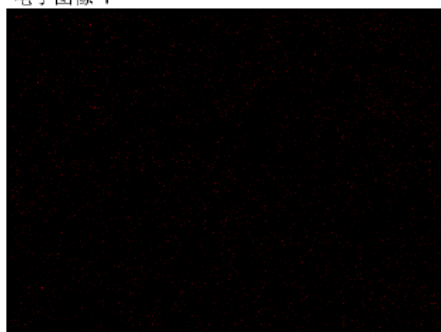

Pt La1

注释: 03 EDS elemental mapping of Ni, Pt in x = 0.91 sample

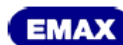

Figure S2 EDS mappings of Ni and Pt in  $[\text{Cl-BzPy}][\text{Ni}_x\text{Pt}_{1-x}(\text{mnt})_2]$  ( $x = 0.09, 0.54$  and  $0.91$ ).

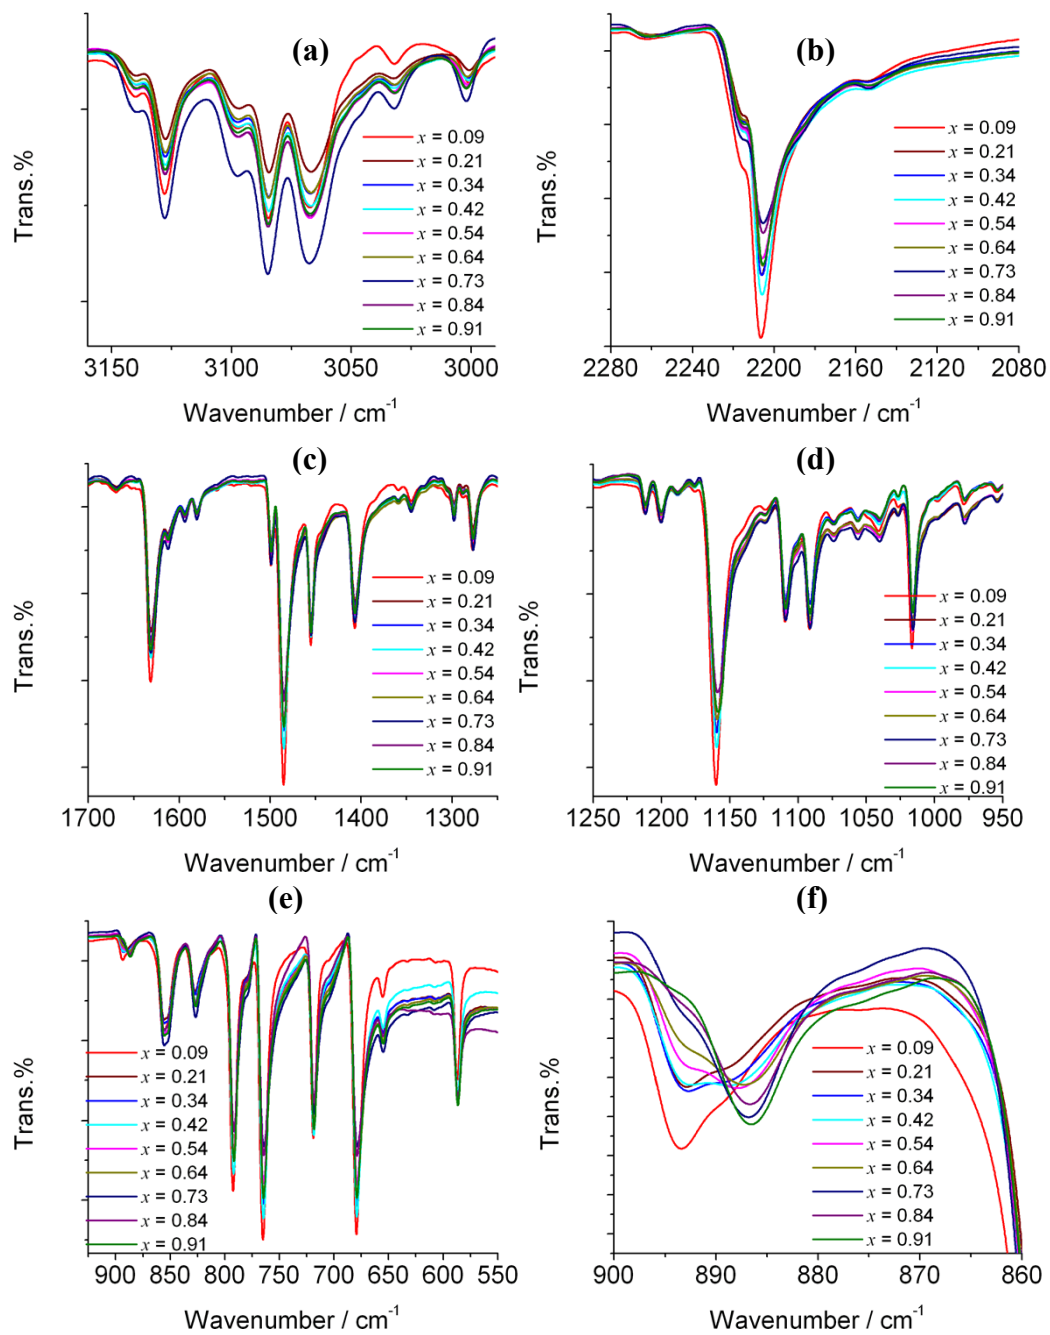

Figure S3 IR spectra for alloy compounds  $[\text{Cl-BzPy}][\text{Ni}_x\text{Pt}_{1-x}(\text{mnt})_2]$  ( $x = 0.09-0.91$ ) in the range  $3190-550 \text{ cm}^{-1}$ .



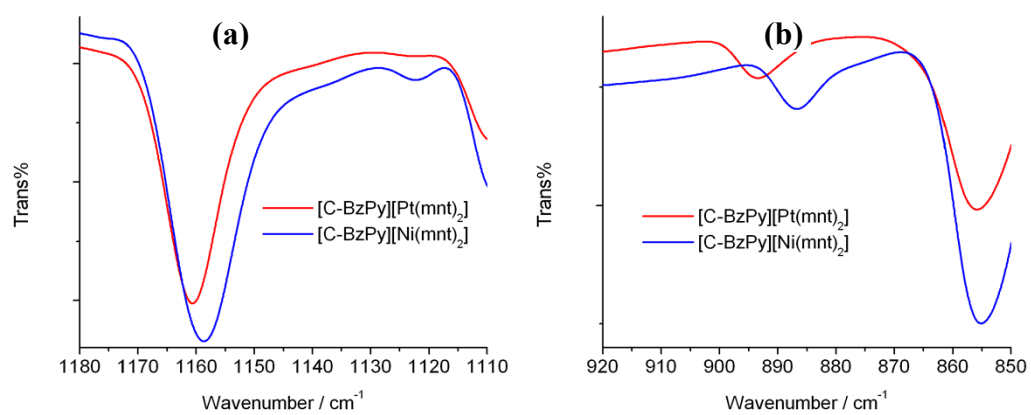

**Figure S4** IR spectra of [Cl-BzPy][Ni(mnt)<sub>2</sub>] and [Cl-BzPy][Pt(mnt)<sub>2</sub>] (a) the band of  $\nu_{C-S} + \nu_{C-C}$  and  $\pi_{C-CN}$  (b) the band of  $\nu_{C-S}$  from  $\text{mnt}^{2-}$  ligand.

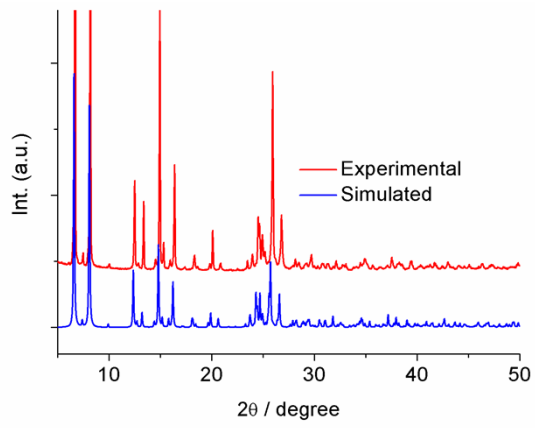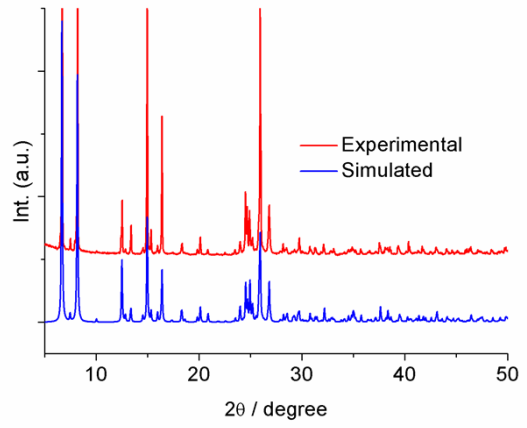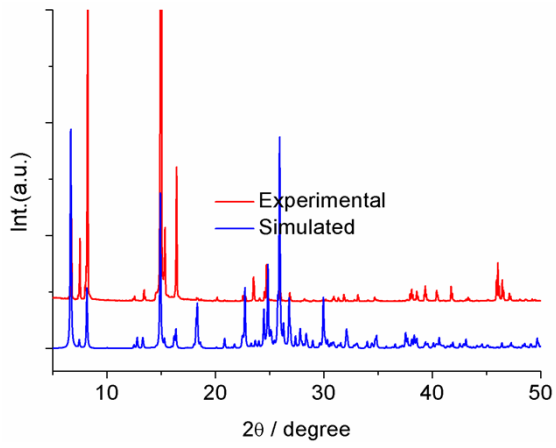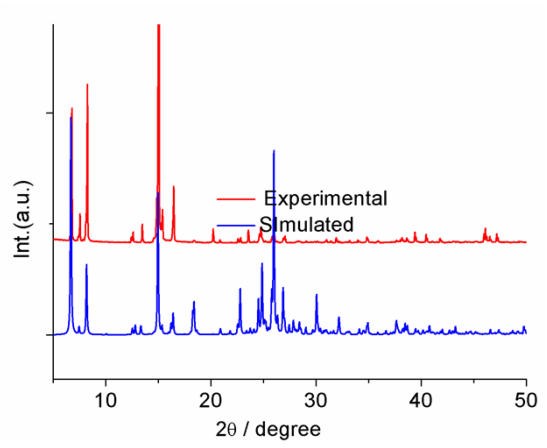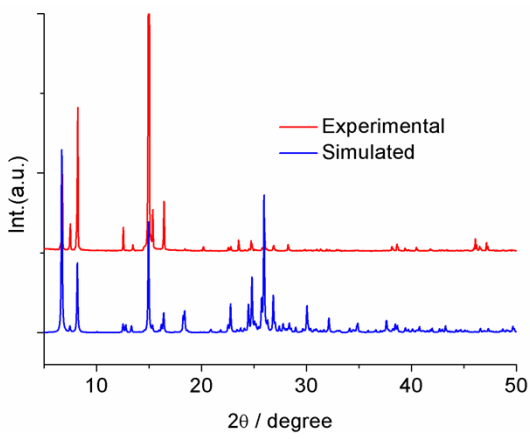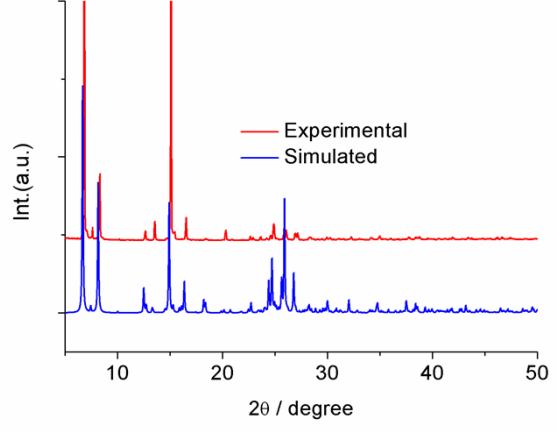

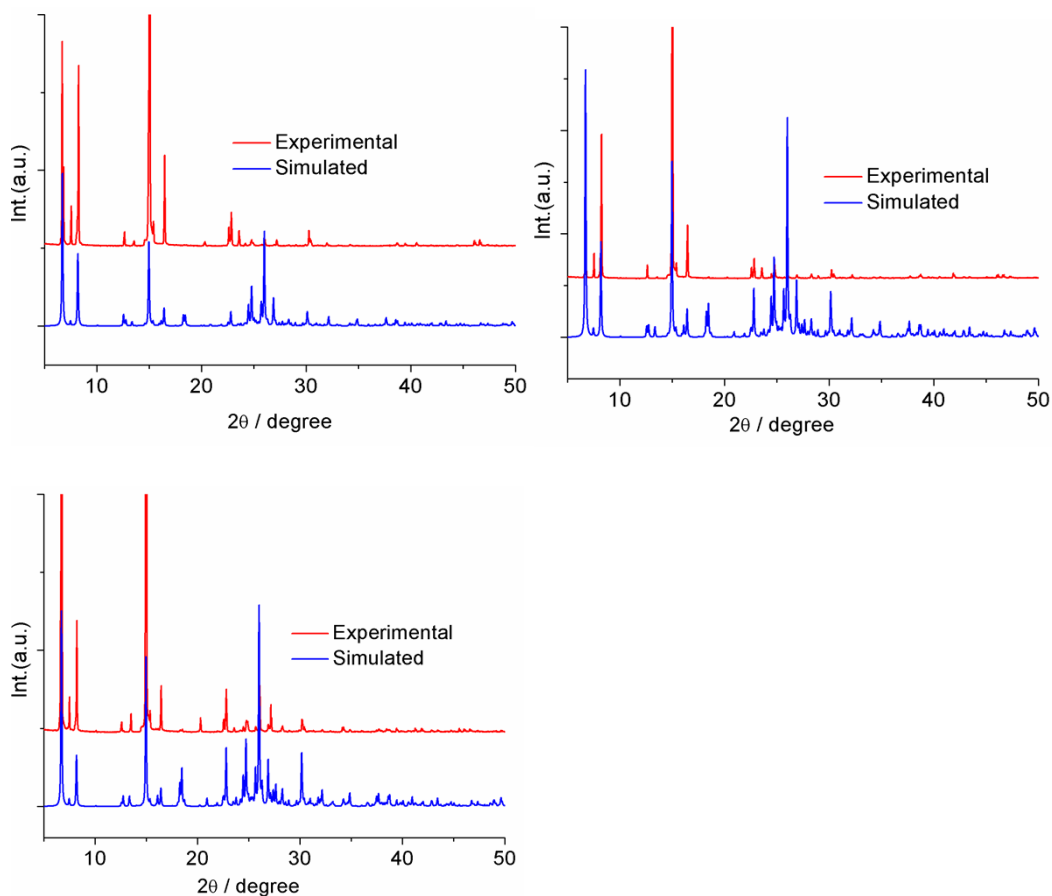

Figure S5 Simulated and Experimental Powder X-ray diffraction profiles for  $x =$  (a) 0.09 (b) 0.21 (c) 0.34 (d) 0.42 (e) 0.54 (f) 0.64 (g) 0.73 (h) 0.84 (i) 0.91.

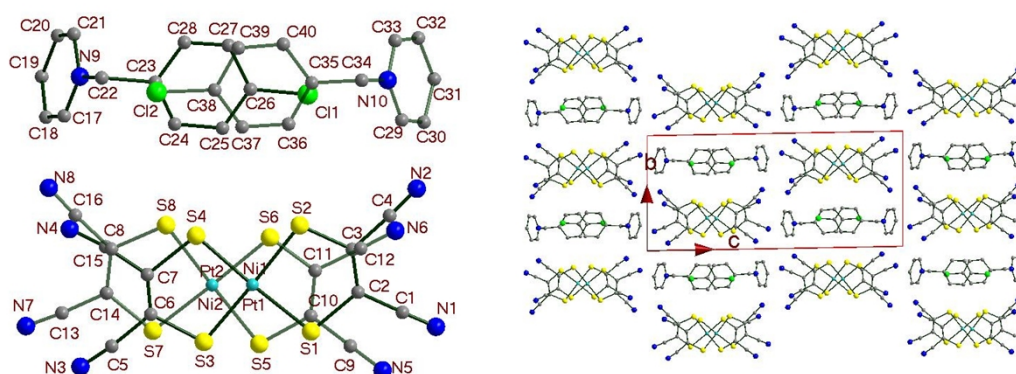

Figure S5 An asymmetric unit with non-H atoms labels and packing structure of  $[\text{Cl-BzPy}][\text{Ni}_x\text{Pt}_{1-x}(\text{mnt})_2]$  ( $x = 0.54$ ) viewed along  $a$ -axis at 100 K.
